# Supplementary material
Source: Springer Nature journal article supplement (https://www.springermedizin.de/resource/supplementary/12889_2008_1664_MOESM2_ESM.pdf/9503682)

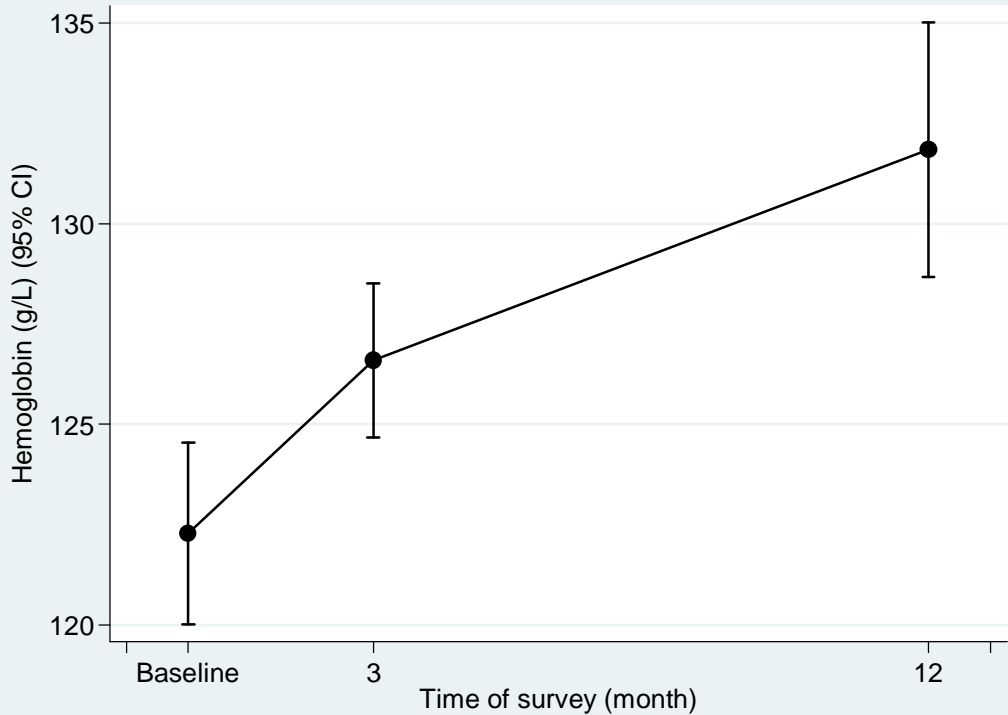

Supplement: MOESM2 [file 9503682]
